# Supplementary material
Source: PubMed Central journal article supplement (PMC2901010)
Supplement: 10.3163.1536-5050.98.3.014.sg001.pdf [file 10.3163.1536-5050.98.3.014.sg001.pdf]

**Publication rate of abstracts of papers and posters presented at Medical Library Association  
annual meetings**

**Sally A. Harvey, MLS, AHIP; Janene R. Wandersee, MA, MLS**

**APPENDIX**

**Publication rates of abstracted projects from the Medical Library Association annual  
meetings**

1. Medical Library Association annual meeting presenter

You are receiving this survey because you presented either a poster or a paper at an annual meeting of the Medical Library Association during 2002 or 2003. If you had more than one presentation at either the 2002 or 2003 annual meeting or if you had presentations at both meetings, please respond only once, and answer for the first presentation you gave, chronologically. Thank you for your participation!

2. Welcome

Thank you for your participation. Please answer the following questions regarding your abstract and presentation from the Medical Library Association annual meeting from 2002 or 2003. If you had multiple presentations, please answer only once and answer for the first presentation you gave, chronologically. If you need to reference the meeting programs, you can do so at this address: [www.mlanet.org/am/meetings.html](http://www.mlanet.org/am/meetings.html).

1. Did your abstract and presentation result in a paper published in a peer-reviewed journal?

- Yes
- No

2. Did your abstract and presentation result in a paper published in a non-peer-reviewed journal?

- Yes
- No

3. If you answered "Yes" to question 1 or 2, please state the journal where your paper was published. \_\_\_\_\_

4. If you answered "No" to question 1 and 2, have you submitted your abstract for publication?

- Yes
- No

5. If you answered "Yes" to question 4, please answer the following:

- Paper was accepted, publication pending.
- Still awaiting response from journal/editor.
- Paper was rejected and the following reason was given: \_\_\_\_\_

6. If you did not submit your abstract and presentation for publication, please choose the *main* reason you did not do so:

- Wish to expand paper/project further
- Methodological problems
- Fear of rejection
- Time restrictions
- Moved/no longer with sponsoring institution
- Other (please specify) \_\_\_\_\_

7. If you did not submit your abstract and presentation for publication, please choose the secondary reason(s), if any, you did not do so (check all that apply):

- Wish to expand paper/project further
- Methodological problems
- Fear of rejection
- Time restrictions
- Moved/no longer with sponsoring institution
- Other (please specify): \_\_\_\_\_

8. To which chapter of MLA do you belong?

- Hawaii-Pacific Chapter
- Medical Library Group of Southern California and Arizona
- Mid-Atlantic Chapter
- Midcontinental Chapter
- Midwest Chapter
- New York-New Jersey Chapter
- North Atlantic Health Sciences Libraries
- Northern California and Nevada Medical Library Group
- Pacific Northwest Chapter
- Philadelphia Regional Chapter
- Pittsburgh Regional Chapter
- South Central Chapter
- Southern Chapter
- Upstate New York and Ontario Chapter
- None
- Other (please specify): \_\_\_\_\_

9. In which type of institution were you employed when you presented your paper or poster at the MLA annual meeting in question? (2002 or 2003)

- University
- University hospital
- Teaching hospital
- Community hospital (non-teaching)
- Pharmaceutical or biotech company
- Was not employed
- Other (please specify): \_\_\_\_\_

10. How many years have you been in the library profession?

0-5

5-10

10-15

15-20

20-25

25+

Other (please specify): \_\_\_\_\_
